# Supplementary material for: Disease-Specific Survival of Type I and Type II Epithelial Ovarian Cancers—Stage Challenges Categorical Assignments of Indolence & Aggressiveness
Source: Diagnostics (Basel). 2020 Jan 21;10(2):56. doi: 10.3390/diagnostics10020056 (PMC7168156; doi:10.3390/diagnostics10020056)
Supplement: Supplementary file 1 [file diagnostics-10-00056-s001.pdf]

Table S1. Comparisons of Type I and II EOC.<sup>1, 2,3,4</sup>

|                                                                                | <b>Type I</b>                                                                                           |                                                                                                     | <b>Type II</b>                                   |                                                                                  |
|--------------------------------------------------------------------------------|---------------------------------------------------------------------------------------------------------|-----------------------------------------------------------------------------------------------------|--------------------------------------------------|----------------------------------------------------------------------------------|
| Behavior                                                                       | Indolent,<br>5 yr survival ~55%                                                                         |                                                                                                     | Aggressive,<br>5 yr survival ~30%                |                                                                                  |
| Continuum                                                                      | cystadenoma/adenofibroma-><br>borderline tumors-> invasive ca                                           |                                                                                                     | Fimbrial epithelium of<br>fallopian tube         |                                                                                  |
|                                                                                |                                                                                                         | <b>Precursor</b>                                                                                    |                                                  | <b>Precursor</b>                                                                 |
| <b>Endometrioid carcinoma<br/>(EC, 3-5%)</b>                                   | <b>Low grade (grade 1&amp;2)</b><br>mutations in PTEN tumor<br>suppressor (20%) with KRAS<br>expression | Associated with<br>endometriosis<br>(19%)                                                           | <b>High grade (grade 3+)</b>                     | Associated with<br>endometriosis<br>(19%)                                        |
| <b>Clear cell carcinoma<br/>(CCC, 10-26%)</b>                                  | <b>All grades: 1,2,3</b> , mutations in<br>PTEN tumor suppressor (8.3%)                                 | Associated with<br>endometriosis<br>(36%)                                                           | ----                                             | ----                                                                             |
| <b>Mucinous carcinoma<br/>(MC, 2-6%)</b>                                       | <b>All grades:1,2,3,4</b>                                                                               | Mucinous<br>cystadenoma;<br>associated with<br>endometriosis,<br>teratoma,<br>Brenner tumor,<br>MBT | ----                                             | ----                                                                             |
| <b>Serous carcinoma (SC, 73-<br/>80%)</b>                                      | <b>Low grade<br/>(grade 1, 3-5%)</b>                                                                    | Serous<br>cystadenoma,<br>adenofibroma,<br>atypical serous<br>tumor (SBT)                           | <b>High grade<br/>(grade 2 &amp; 3+, 70-75%)</b> | Ovarian surface<br>epithelium;<br>SCOUT-><br>p53 signature -><br>STIL/TILT->STIC |
| <b>Transitional cell carcinoma<br/>(TCC), 2%/<br/>Brenner tumor (BT, 1-3%)</b> | <b>All grades:1,2,3,4</b>                                                                               | Brenner tumor                                                                                       | ----                                             | ----                                                                             |
| <b>Undifferentiated<br/>carcinoma (UC, 5%)</b>                                 | ----                                                                                                    | ----                                                                                                | <b>All are grade<br/>3</b>                       | ?                                                                                |
| <b>Carcinosarcoma<br/>(CS, 1%)</b>                                             | ----                                                                                                    | ----                                                                                                | <b>All grades:1,2,3+</b>                         | ?                                                                                |
| Genome                                                                         | Not very unstable                                                                                       |                                                                                                     | Highly unstable                                  |                                                                                  |
| TP53 mutation                                                                  | Low (LGSC<10%)                                                                                          |                                                                                                     | High (HGSC ~80%)                                 |                                                                                  |

| BRCA1/2 mutation           | Low                        |  | Mutated,<br>hypermethylated or<br>dysfunctional (HGSC) |  |
|----------------------------|----------------------------|--|--------------------------------------------------------|--|
| PTEN mutation              | 15-20% (EC: 20%, CCC: 8%)  |  | Low                                                    |  |
| HNF-1 beta overexpression  | 90% (EC, CCC)              |  | Low                                                    |  |
| ARID1A mutation            | 40-50% (EC)                |  | Not found                                              |  |
| CTNNB1 mutation            | 30% (EC)                   |  | Low                                                    |  |
| PIK3CA                     | 0% (grade 1 or 2 EC & CCC) |  | 25% ( grade 3+ EC & CCC)                               |  |
| Microsatellite instability | 50% (EC, CCC)              |  | 8-28%                                                  |  |
| KRAS mutation              | 30-65% (EC, MC)            |  | Low                                                    |  |
| BRAF mutation              | 30-65% (LGSC)              |  | Low                                                    |  |
| HER2/neu overexpression    | Low                        |  | HGSC: 20-67%                                           |  |
| AKT overexpression         | Low                        |  | 12-30%                                                 |  |
| p16 inactivation           | Low                        |  | 15%                                                    |  |
| HLA-G overexpression       | Low LGSC                   |  | HGSC: 61%                                              |  |
| APO E overexpression       | Low                        |  | HGSC: 66%                                              |  |
| Ki67 proliferation index   | 10-15%                     |  | HGSC: 50-75%                                           |  |

Serous, endometrioid, mucinous, clear cell, transitional cell, Brenner tumor, undifferentiated carcinomas and carcinosarcomas make up the different subtypes of epithelial EOC.<sup>5</sup> Traditionally, EOC is thought to arise from the ovarian surface epithelium and through metaplastic transformation.<sup>6</sup> Recent studies have challenged this paradigm and suggest a dualistic model of EOC carcinogenesis involving Type I and Type II EOC.<sup>2</sup> Type I tumors behave indolently and develop from benign precursor lesions that progress towards borderline tumors and then finally to invasive tumors. These tumors are often large, unilateral, cystic, and confined to the ovary at the time of diagnosis with genomic stability. They are thought to originate from benign extraovarian lesions that embed in the ovary and undergo several mutations leading to malignant transformation. For example, low-grade serous carcinoma may develop from deposits of benign fallopian tube epithelium in the ovary, and clear cell and endometrioid carcinomas from endometriosis. Type I tumors are genetically stable with mutations in KRAS, BRAF, PTEN, PIK3CA, CTNNB1, ARID1A, and PPP2R1A. P53 mutations are rare.<sup>7</sup> Low-grade endometrioid tumors carry CTNNB1, PTEN, and PIK3CA mutations; low-grade mucinous tumors have mutations in

KRAS; low-grade clear cell tumors can carry PIK3CA mutations.<sup>2</sup> Patients with Type I tumors are younger, and there appears to be an increased risk for EOC with higher BMI.<sup>8</sup> Additionally, better disease-free survival has been noted in Type I tumors.<sup>9</sup>

In an analysis of the Prostate, Lung, Colorectal and Ovarian (PLCO) screening trial, Type I tumors had a greater likelihood of being diagnosed at early (Stage I/II) stage.<sup>10</sup>

In contrast, Type II tumors are unvaryingly high grade, develop rapidly, and behave aggressively, with > 75% of cases presenting in advanced stage. Type II tumors consist of high-grade serous carcinoma, high-grade endometrioid carcinoma, malignant mixed mesodermal tumors (carcinosarcomas), and undifferentiated carcinomas.<sup>11</sup> Extraovarian disease of Type II tumors is substantially greater with involvement of the omentum and mesentery. Ascites generally accompanies Type II EOC tumors. At the molecular level, high-grade serous carcinomas overwhelmingly carry TP53 mutations.<sup>2</sup> High-levels of chromosomal rearrangements have been identified resulting in genetic instability in Type II tumors. Inactivation of BRCA 1/2 by mutation or other mechanisms occurs in 40-50% of sporadic high-grade serous carcinomas.<sup>3</sup>

Table S2. Results from recent EOC survival analyses.

|                                                                                             | Pavlik – this report                                                                                                                                                          | Peres et al <sup>12</sup>                                                                                                                                                    | Lan & Yang <sup>13</sup>                                                                                                                                                        |
|---------------------------------------------------------------------------------------------|-------------------------------------------------------------------------------------------------------------------------------------------------------------------------------|------------------------------------------------------------------------------------------------------------------------------------------------------------------------------|---------------------------------------------------------------------------------------------------------------------------------------------------------------------------------|
| SEER submission period                                                                      | 1995-2015                                                                                                                                                                     | 2004-2014                                                                                                                                                                    | 1973-2015                                                                                                                                                                       |
| Survival type                                                                               | Disease-specific                                                                                                                                                              | Overall                                                                                                                                                                      | Overall                                                                                                                                                                         |
| Size of SEER set analyzed                                                                   | 35,901:<br>Serous: 21043<br>low grade: 1351<br>high grade: 19692<br>Endometrioid: 6912<br>Clear cell: 2605<br>Mucinous: 3636<br>Carcinosarcoma: 1319<br>Undifferentiated: 304 | 28,118:<br>Serous: 18545<br>low grade: 708<br>high grade: 17837<br>Endometrioid: 2782<br>Clear cell: 2695<br>Mucinous: 2641<br>Carcinosarcoma: 1381<br>Malignant Brenner: 74 | 77,658<br>Serous: 49480<br>low grade: 2755<br>high grade: 46,735<br>Endometrioid: 7460<br>Clear cell: 6214<br>Mucinous: 10612<br>Carcinosarcoma: 3613<br>Malignant Brenner: 269 |
| Regardless of stage, best survivor outcomes                                                 | Low grade mucinous, low grade endometrioid (Fig 2A), low grade clear cell                                                                                                     | Endometrioid & low grade serous                                                                                                                                              | Low grade serous, endometrioid (Table 3), clear cell ( <b>*did not analyze for grade, except serous</b> )                                                                       |
| Localized/regional disease (stage I & II) worst survival                                    | Carcinosarcoma                                                                                                                                                                | Carcinosarcoma                                                                                                                                                               | Carcinosarcoma                                                                                                                                                                  |
| Localized/regional disease (stage I & II) worse survival within 2 yrs                       | Carcinosarcoma                                                                                                                                                                | Carcinosarcoma                                                                                                                                                               | Carcinosarcoma                                                                                                                                                                  |
| Distant disease (stage III & IV), poor survival & similar                                   | Grade 3 clear cell, grade 2-3 mucinous, grade 2-3 serous & all grades carcinosarcoma                                                                                          | Clear cell, mucinous & carcinosarcoma                                                                                                                                        | Clear cell, mucinous & carcinosarcoma                                                                                                                                           |
| Distant disease (stage III & IV), poor survival & similar within 2 yrs (to p 62 end para 2) | Grade 3 clear cell > grade 2-3 mucinous > grade 2-3 serous > all grades carcinosarcoma                                                                                        | Clear cell, mucinous & carcinosarcoma                                                                                                                                        | Clear cell, mucinous & carcinosarcoma                                                                                                                                           |
| Localized disease (stage I): 1 & 5 yr survivals                                             | All low grade histotypes >80%, except carcinosarcoma (5yr: 72.2%, 67.9-76.0%)                                                                                                 | All histotypes >80%, except carcinosarcoma (5yr: 70.7%, 56.3-81.1%)                                                                                                          | All histotypes >80%, except carcinosarcoma (5yr: 65.4%)                                                                                                                         |
| Regional disease (stage II): 1 yr survivals                                                 | All histotypes >80%, except grade 3 carcinosarcoma                                                                                                                            | All histotypes >80%                                                                                                                                                          | All histotypes >80%, except carcinosarcoma                                                                                                                                      |
| Regional disease (stage II): 5 yr survivals                                                 | All histotypes <80%, except grade 1 & 2 endometrioid & grade 1 & 2 clear cell & grade 1 & 2 mucinous & grade 1 serous                                                         | All histotypes <80%, except low grade serous & endometrioid                                                                                                                  | All histotypes <80%, except low grade serous & endometrioid                                                                                                                     |

|                                                                 |                                                                                                                    |                                                                                                                    |                                                                                  |
|-----------------------------------------------------------------|--------------------------------------------------------------------------------------------------------------------|--------------------------------------------------------------------------------------------------------------------|----------------------------------------------------------------------------------|
| Regional disease (stage II): 5 yr survivals                     | Worst outcomes for carcinosarcoma                                                                                  | Worst outcomes for carcinosarcoma (38.6%, 32-45.1%)                                                                | Worst outcomes for carcinosarcoma (40.4%)                                        |
| Regional disease (stage II): 10 yr survivals                    | Worst outcomes for carcinosarcoma                                                                                  | Worst outcomes for carcinosarcoma (29%, 22.4-35.9%)                                                                | Worst outcomes for carcinosarcoma (30.5%)                                        |
| Across all survival times & regardless of stage: best outcome   | Endometrioid> low grade serous                                                                                     | Low grade serous                                                                                                   | Endometrioid> low grade serous                                                   |
| Distant disease (stage III & IV), 1 yr survival                 | <65% --- mucinous (64.9%, 64.3-65.6%)                                                                              | <40% --- mucinous (37.9%, 33.9-41.8%)                                                                              | <50% --- mucinous (42%)                                                          |
| Distant disease (stage III & IV), 1 yr survival                 | Clear cell (74.3%, 73.3-75.6%), carcinosarcoma (58.8%, 56.7-60.8%)                                                 | Clear cell (63.3%, 58.5-67.6%), carcinosarcoma (60%, 56.8-63%)                                                     | Clear cell (65%), carcinosarcoma (58%)                                           |
| Distant disease (stage III & IV), 1 yr survival                 | All other histotypes >80%                                                                                          | All other histotypes >80%                                                                                          | All other histotypes >80%                                                        |
| Distant disease (stage III & IV), 5 yr survival                 | Most histotypes <35% & clear cell, carcinosarcoma & mucinous <35%                                                  | Most histotypes <35% & clear cell, carcinosarcoma & mucinous <22%                                                  | Most histotypes <35% & clear cell, carcinosarcoma & mucinous <22%                |
| Distant disease (stage III & IV), 10 yr survival                | clear cell, carcinosarcoma & mucinous <35%                                                                         | clear cell, carcinosarcoma & mucinous <22%                                                                         | clear cell, carcinosarcoma & mucinous <22%                                       |
| Distant disease (stage III & IV), 5-10 yr survival              | All other histotypes survival continued to decline                                                                 | All other histotypes survival continued to decline                                                                 | All other histotypes survival continued to decline                               |
| Distant disease (stage III & IV), best survival, 10 yr survival | Endometrioid (53.8, 52.7-54.8%)                                                                                    | Low grade serous (37.3%, 29-45.7%)                                                                                 | Low grade serous (40.7%), Endometrioid (34.4%)                                   |
| Localized/regional disease (stage I & II) all survival periods  | Risk of mortality: Endometrioid & low grade serous better than high grade serous                                   | Risk of mortality: Endometrioid & low grade serous better than high grade serous                                   | Risk of mortality: Endometrioid & low grade serous better than high grade serous |
| Localized disease (stage I), 1-4 yrs survival                   | Risk of mortality: high grade serous better than carcinosarcoma                                                    | Risk of mortality: high grade serous better than carcinosarcoma                                                    | Risk of mortality: high grade serous better than carcinosarcoma                  |
| Localized disease (stage I), 4-10 yrs survival ?                | Relative to high grade serous HR of all histotypes <1. Cumulative survivals for high grade serous ~ carcinosarcoma | Relative to high grade serous HR of all histotypes <1. Cumulative survivals for high grade serous > carcinosarcoma | Risk of mortality: high grade serous better than carcinosarcoma                  |
| Localized/regional disease (stage I & II), 4-10 yrs survivals   | Relative to high grade serous HR of all histotypes <1. Cumulative survivals for high grade serous ~ carcinosarcoma | Relative to high grade serous HR of all histotypes <1. Cumulative survivals for high grade serous > carcinosarcoma | Cumulative survivals for high grade serous > carcinosarcoma                      |

|                                                    |                                                                                    |                                                                                    |                                                                                    |
|----------------------------------------------------|------------------------------------------------------------------------------------|------------------------------------------------------------------------------------|------------------------------------------------------------------------------------|
| Distant disease (stage III & IV), 1-2 yrs survival | Cumulative survivals for high grade serous > mucinous, clear cell & carcinosarcoma | Cumulative survivals for high grade serous > mucinous, clear cell & carcinosarcoma | Cumulative survivals for high grade serous > mucinous, clear cell & carcinosarcoma |
| Distant disease (stage III & IV), 1 yr survival    | Mucinous HR 1.51, 1.45-1.56 relative to high grade serous                          | Mucinous HR 3.87, 3.45-4.34 relative to high grade serous                          | Mucinous HR 2.083, 1.97-2.197 relative to high grade serous                        |
| Most favorable outcomes                            | Low grade serous & endometrioid regardless of stage & grade 1 & 2 clear cell       | Low grade serous & endometrioid regardless of stage                                | Low grade serous & endometrioid regardless of stage                                |
| Strikingly high mortality                          | Carcinosarcoma & distant stage mucinous and clear cell (1-2 yrs)                   | Carcinosarcoma & distant stage mucinous and clear cell (1-2 yrs)                   | Carcinosarcoma & distant stage mucinous and clear cell (1-2 yrs)                   |
| All stages of high grade serous                    | Highest mortality 4 or more years after diagnosis                                  | Highest mortality 4 or more years after diagnosis                                  | Highest mortality 4 or more years after diagnosis, except for carcinosarcoma       |

1. Kurman RJ, Shih I-M. Molecular pathogenesis and extraovarian origin of epithelial ovarian cancer – Shifting the paradigm. *Human Pathology*. 2001;42(7):918-931. doi: 10.1016/j.humpath.2011.03.003
2. Koshiyama M, Matsumura N, Konishi I. Recent concepts of ovarian carcinogenesis: Type I and Type II. *Biomed research international*. 2014;2014:934261. doi: 10.1155/2014/934261.
3. Willner J, Wurz K, Allison KH, Galic V, Garcia RL, Goff BA, Swisher EM. Alternate molecular genetic pathways in ovarian carcinomas of common histological types. *Hum Pathol*. 2007;38(4):607-13. DOI: 10.1016/j.humpath.2006.10.007.
4. Kurman RJ, Visvanathan K, Roden R, Wu TC, Shih I-M. Early detection and treatment of ovarian cancer: shifting from early stage to minimal volume of disease based on a new model of carcinogenesis. *American journal of obstetrics & gynecology*. 2008;198(4):351-356. doi: 10.1016/j.ajog.2008.01.005.
5. Torre LA, Trabert B, DeSantis CE, Miller KD, Samimi G, Runowicz CD, Gaudet MM, Jemal A, Siegel RL. Ovarian Cancer Statistics, 2018. *CA: a cancer journal for clinicians*. 2018; 68: 284-296. doi: 10.3322/caac.21456.
6. Crum CP, McKeon FD, Xian W. The oviduct and ovarian cancer: causality, clinical implications, and "targeted prevention". *Clin Obstet Gynecol*. 2012 Mar;55(1):24-35. doi: 10.1097/GRF.0b013e31824b1725.
7. Gershenson DM, Tortolero-Luna G, Malpica A, Baker VV, Whittaker L, Johnson E, Follen Mitchell M. Ovarian intraepithelial neoplasia and ovarian cancer. *Obstet Gynecol Clin North Am*. 1996 Jun;23(2):475-543.
8. Crum CP. Intercepting pelvic cancer in the distal fallopian tube: theories and realities. *Mol Oncol*. 2009; 3(2):165-170. doi: 10.1016/j.molonc.2009.01.004.

- 
9. Skirnisdottir I, Seidal T, Akerud H. Differences in Clinical and Biological Features Between Type I and Type II Tumors in FIGO Stages I-II Epithelial Ovarian Carcinoma. *International journal of gynecological cancer*. 2015;25(7): 1239-47. doi: 10.1097/IGC.0000000000000484.
  10. Terada KY, Ahn HJ, Kessel B. Differences in risk for type 1 and type 2 ovarian cancer in a large cancer screening trial. *Journal of gynecologic oncology*. 2016;27(3): e25. doi: 10.3802/jgo.2016.27.e25.
  11. Kindelberger DW, Lee Y, Miron A, Hirsch MS, Feltmate C, Medeiros F, Callahan MJ, Garner EO, Gordon RW, Birch C, Berkowitz RS, Muto MG, Crum CP. Intraepithelial carcinoma of the fimbria and pelvic serous carcinoma: Evidence for a causal relationship. *Am J Surg Pathol*. 2007;31(2):161-9. DOI: 10.1097/01.pas.0000213335.40358.47.
  12. Peres LC, Cushing-Haugen KL, Köbel M, Harris HR, Berchuck A, Rossing MA, Schildkraut JM, Doherty JA. Invasive Epithelial Ovarian Cancer Survival by Histotype and Disease Stage. *J Natl Cancer Inst*. 2019; 111(1):60-68. doi: 10.1093/jnci/djy071.
  13. Lan A, Yang G. Clinicopathological parameters and survival of invasive epithelial ovarian cancer by histotype and disease stage. *Future Oncol*. 2019; 15(17):2029-2039. doi: 10.2217/fon-2018-0886. Epub 2019 May 29.
